# Supplementary material for: Genome taxonomy of the genus Neptuniibacter and proposal of Neptuniibacter victor sp. nov. isolated from sea cucumber larvae
Source: PubMed Central journal article supplement (PMC10426996; doi:10.1371/journal.pone.0290060), 2023-08-15
Supplement: pone.0290060.s001.pdf [file pone.0290060.s001.pdf]

**S1 Table. Chemotaxonomic profile of previously described *Neptuniibacter***

|                                                                      | <i>Neptuniibacter halophilus</i> | <i>Neptuniibacter caesariensis</i> | <i>Neptuniibacter marinus</i> | <i>Neptuniibacter pectenicola</i> |
|----------------------------------------------------------------------|----------------------------------|------------------------------------|-------------------------------|-----------------------------------|
| <b>Predominant FA</b>                                                |                                  |                                    |                               |                                   |
| iso-C10:0                                                            | 1.2                              | nd                                 | nd                            | nd                                |
| anteiso-C11:0                                                        | 1.8                              | nd                                 | nd                            | nd                                |
| C14:0                                                                | 1.1                              | nd                                 | 1.3                           | tr                                |
| C16:0                                                                | 15.5                             | 16.1                               | 25.7                          | 22.8                              |
| C16:1 $\omega$ 7c and/or<br>C16:1 $\omega$ 6c and/or<br>C15 iso 2-OH | 39.8                             | 41.2                               | 36.8                          | 23.0                              |
| C18:0                                                                | 1.8                              | 1.0                                | 4.1                           | 1.9                               |
| C18:1 $\omega$ 7c and/or<br>C18:1 $\omega$ 6c                        | 29.4                             | 35.9                               | 23.7                          | 37.0                              |
| 19:0 10-methyl                                                       | nd                               | nd                                 | nd                            | 1.9                               |
| C10:0 3OH                                                            | 7.5                              | 5.0                                | 5.1                           | 8.7                               |
| C11:0 2OH                                                            | 1.6                              |                                    |                               |                                   |
| C12:1 3OH                                                            | nd                               | nd                                 | 1.4                           | 2.0                               |
| <b>Major lipid class</b>                                             |                                  |                                    |                               |                                   |
| PG                                                                   | +                                | +                                  | +                             | +                                 |
| PE                                                                   | +                                | +                                  | +                             | +                                 |
| DPG                                                                  | nd                               | nd                                 | +                             | +                                 |
| PL                                                                   | PL1 : +<br>PL2 : -               | nd                                 | +                             | +                                 |
| AL                                                                   | AL1 : +<br>AL2 : +               | nd                                 | +                             | -                                 |
| PN                                                                   | nd                               | nd                                 | +                             | +                                 |
| <b>Ubiquinone</b>                                                    |                                  |                                    |                               |                                   |
|                                                                      | Q8                               | Q8                                 | Q8                            | Q8                                |

PG, phosphatidylglycerol; PE, phosphatidylethanolamine; DPG, diphosphatidylglycerol; PL, phospholipids; AL, aminolipid; PN, phosphoaminolipid; nd: not determined.
