# Supplementary material for: Genome taxonomy of the genus Neptuniibacter and proposal of Neptuniibacter victor sp. nov. isolated from sea cucumber larvae
Source: PubMed Central journal article supplement (PMC10426996; doi:10.1371/journal.pone.0290060), 2023-08-15
Supplement: pone.0290060.s007.pdf [file pone.0290060.s007.pdf]

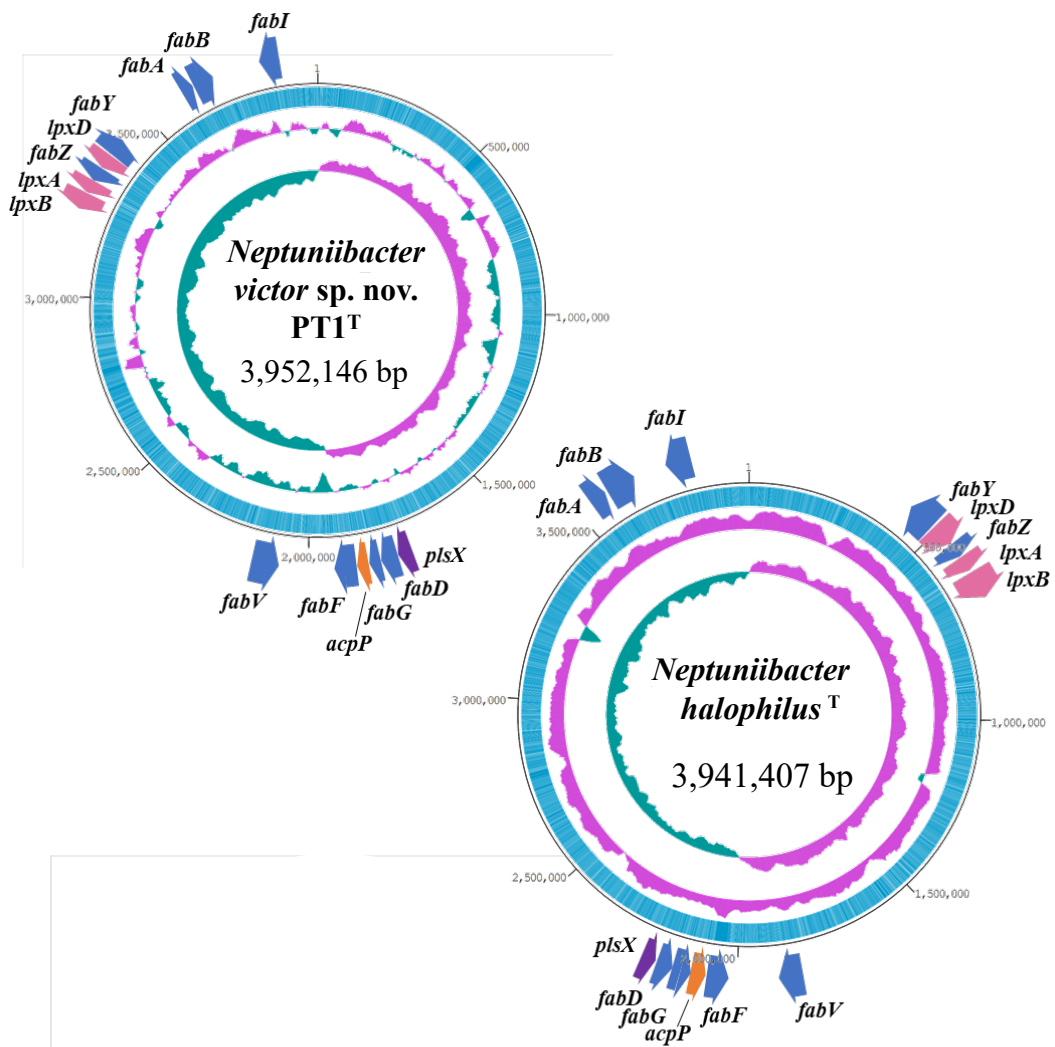

**S6 Fig . Genomic distribution of *fab* and associated genes.**

Protein/enzyme name each gene is coding: *fabA*: 3-hydroxyacyl-ACP dehydrase/trans-2-decanoyl-ACP isomerase; *fabB*: 3-ketoacyl-ACP synthase I; *fabD*: malonyl-CoA: ACP transacylase; *fabF*: 3-ketoacyl-ACP synthase II; *fabG*: 3-ketoacyl-ACP reductase; *fabI*: enoyl-ACP reductase I; *fabV*: enoyl-ACP reductase; *fabY*: 3-ketoacyl-ACP synthase; *fabZ*: 3-hydroxyacyl-ACP dehydratase; *acpP*: Acyl-carrier protein; *plsX*: FA/phospholipid synthesis protein; *lpxAD*: glucosamine N-acyltransferase; *lpxB*: lipid-A-disaccharide synthase.
