# Supplementary material for: Genome taxonomy of the genus Neptuniibacter and proposal of Neptuniibacter victor sp. nov. isolated from sea cucumber larvae
Source: PLoS One. 2023 Aug 15;18(8):e0290060. doi: 10.1371/journal.pone.0290060 (PMC10426996; doi:10.1371/journal.pone.0290060)
Supplement: S1 Fig — (PDF) [file pone.0290060.s002.pdf]

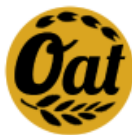

Heatmap generated with OrthoANI values  
calculated from the OAT software.  
Please cite Lee et al. 2015.

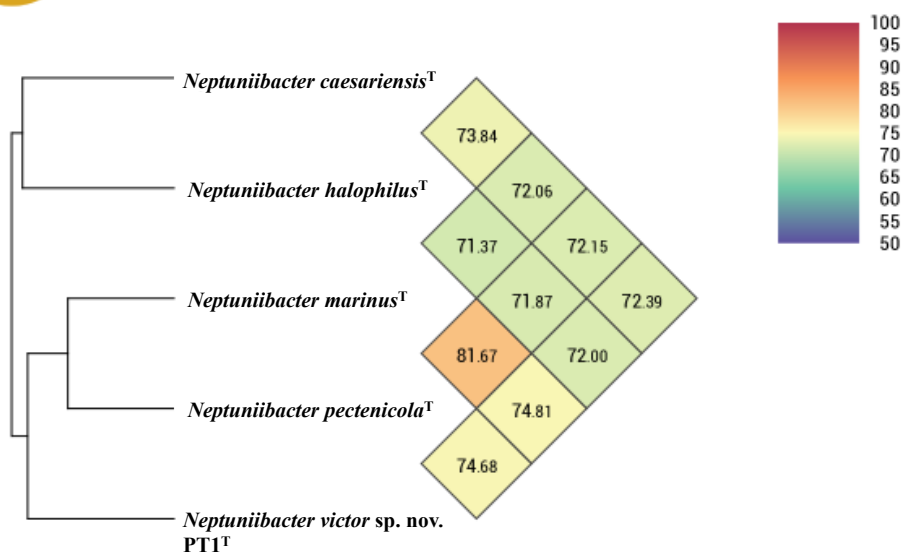

**S1 Fig. Heat map representation of ANI values.**
