# Supplementary material for: Genome taxonomy of the genus Neptuniibacter and proposal of Neptuniibacter victor sp. nov. isolated from sea cucumber larvae
Source: PLoS One. 2023 Aug 15;18(8):e0290060. doi: 10.1371/journal.pone.0290060 (PMC10426996; doi:10.1371/journal.pone.0290060)
Supplement: S2 Fig — Reference genomes were retrieved from NCBI database. (PDF) [file pone.0290060.s003.pdf]

|                                                 | <i>N. victor</i> PT1 <sup>T</sup> | <i>N. caesariensis</i> <sup>T</sup> | <i>N. halophilus</i> <sup>T</sup> | <i>N. marinus</i> <sup>T</sup> | <i>N. pectenicola</i> <sup>T</sup> |
|-------------------------------------------------|-----------------------------------|-------------------------------------|-----------------------------------|--------------------------------|------------------------------------|
| <i>Neptuniibacter victor</i> PT1 <sup>T</sup>   | 100.0                             | 75.8                                | 74.8                              | 77.8                           | 77.8                               |
| <i>Neptuniibacter caesariensis</i> <sup>T</sup> | 75.8                              | 100.0                               | 76.3                              | 73.5                           | 73.2                               |
| <i>Neptuniibacter halophilus</i> <sup>T</sup>   | 74.8                              | 76.3                                | 100.0                             | 73.6                           | 73.5                               |
| <i>Neptuniibacter marinus</i> <sup>T</sup>      | 77.8                              | 73.5                                | 73.6                              | 100.0                          | 87.7                               |
| <i>Neptuniibacter pectenicola</i> <sup>T</sup>  | 77.8                              | 73.2                                | 73.5                              | 87.7                           | 100.0                              |

**S2 Fig. Heat map representation of AAI values.**

Reference genomes were retrieved from NCBI database.
