# Supplementary material for: Genome taxonomy of the genus Neptuniibacter and proposal of Neptuniibacter victor sp. nov. isolated from sea cucumber larvae
Source: PLoS One. 2023 Aug 15;18(8):e0290060. doi: 10.1371/journal.pone.0290060 (PMC10426996; doi:10.1371/journal.pone.0290060)
Supplement: S5 Fig — (PDF) [file pone.0290060.s006.pdf]

*Neptuniibacter pectenicola*<sup>T</sup>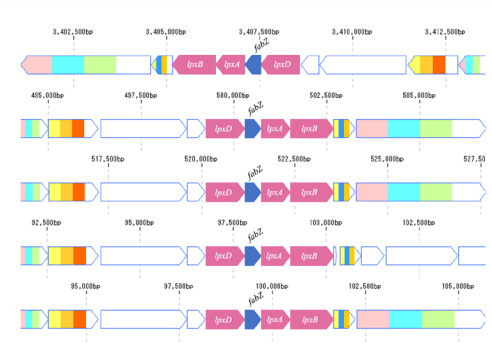*Neptuniibacter pectenicola*<sup>T</sup>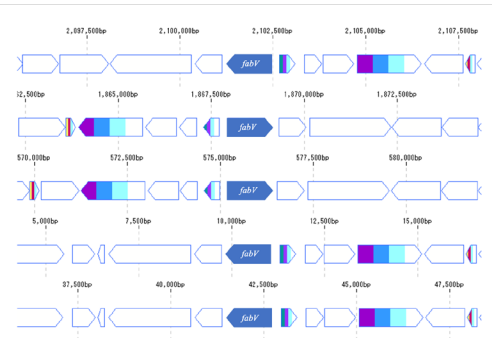*Neptuniibacter pectenicola*<sup>T</sup>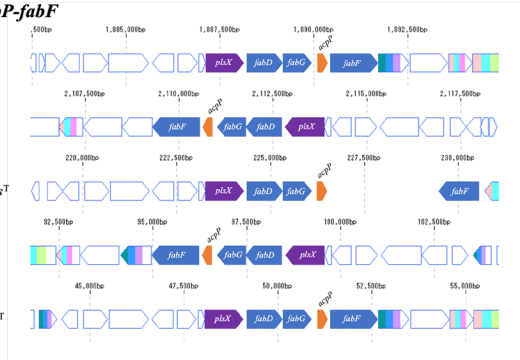*Neptuniibacter pectenicola*<sup>T</sup>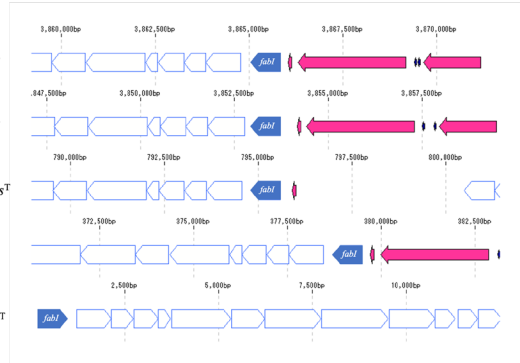*Neptuniibacter pectenicola*<sup>T</sup>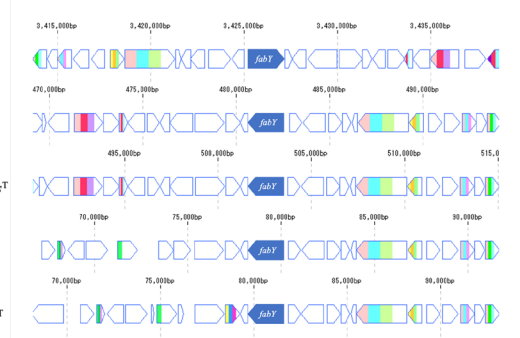

**S5 Fig . Gene structure of FAS associated genes.**
